# Supplementary material
Source: PubMed Central journal article supplement (PMC5724388)
Supplement: NIHMS901187-supplement-supplement_1.pdf [file NIHMS901187-supplement-supplement_1.pdf]

**Supplemental Table S1. Unadjusted and Adjusted Differences in Energy Intake by LCS Consumption among NHANES 2009-2014 Participants**

|                                    | Any LCS                |                       | LCS Beverages          |                       | LCS Foods              |                       |
|------------------------------------|------------------------|-----------------------|------------------------|-----------------------|------------------------|-----------------------|
|                                    | Mean <sup>1</sup> ± SE |                       | Mean <sup>1</sup> ± SE |                       | Mean <sup>1</sup> ± SE |                       |
|                                    | Unadjusted             | Adjusted <sup>2</sup> | Unadjusted             | Adjusted <sup>2</sup> | Unadjusted             | Adjusted <sup>2</sup> |
| <b>Children (2-11 years)</b>       |                        |                       |                        |                       |                        |                       |
| All (n=5,723)                      | 49.2 ± 16.6**          | 7.2 ± 15.4            | 65.8 ± 20.1**          | 11.9 ± 18.1           | 20.1 ± 25.4            | 20.7 ± 23.6           |
| <b>Sex</b>                         |                        |                       |                        |                       |                        |                       |
| Male (n=2,919)                     | 57.6 ± 29.9            | 14.4 ± 30.5           | 61.4 ± 33.5            | 9.1 ± 34.9            | -47.1 ± 41.3           | 57.3 ± 40.1           |
| Female (n=2,804)                   | 53.2 ± 21.6*           | 4.1 ± 21.7            | 79.7 ± 26.4*           | 20.6 ± 21.5           | 2.1 ± 40.8             | -14.2 ± 36.0          |
| <b>Race/Ethnicity</b>              |                        |                       |                        |                       |                        |                       |
| White (n=1,584)                    | 28.0 ± 30.0            | -22.6 ± 29.3          | 42.5 ± 33.2            | -22.2 ± 32.6          | -11.9 ± 41.2           | 15.6 ± 35.0           |
| Black (n=1,406)                    | 54.7 ± 41.2            | 38.1 ± 44.6           | 79.1 ± 40.5            | 61.9 ± 44.9           | -6.3 ± 48.5            | 2.1 ± 42.8            |
| Hispanic (n=2,002)                 | 84.5 ± 34.1*           | 41.3 ± 26.4           | 103.4 ± 38.3**         | 47.2 ± 31.4           | -55.5 ± 44.1           | 43.5 ± 37.2           |
| Other (n=731)                      | 55.8 ± 49.1            | 65.0 ± 54.6           | 73.9 ± 57.6            | 71.3 ± 58.7           | 34.6 ± 70.4            | 9.4 ± 66.5            |
| <b>Income</b>                      |                        |                       |                        |                       |                        |                       |
| 1 <sup>st</sup> tertile (n=2,684)  | 29.1 ± 25.6            | 10.9 ± 26.4           | 58.9 ± 27.5*           | 28.2 ± 27.6           | -35.2 ± 63.6           | 38.1 ± 53.4           |
| 2 <sup>nd</sup> tertile (n= 1,565) | 24.0 ± 34.3            | 21.0 ± 28.3           | 39.3 ± 43.0            | 29.0 ± 33.8           | 9.4 ± 54.2             | 1.2 ± 48.3            |

|                                    |              |              |               |               |                |                |
|------------------------------------|--------------|--------------|---------------|---------------|----------------|----------------|
| 3 <sup>rd</sup> tertile (n= 1,087) | 70.6 ± 37.0  | -13.3 ± 34.5 | 74.6 ± 39.1   | -25.2 ± 38.8  | -21.9 ± 42.5   | 28.9 ± 34.6    |
| <b>Adolescents (12-19 years)</b>   |              |              |               |               |                |                |
| All (n= 3,715)                     | -19.2 ± 40.1 | 46.9 ± 41.9  | -22.5 ± 41.5  | 46.5 ± 42.1   | -7.5 ± 70.9    | 60.2 ± 76.8    |
| <b>Sex</b>                         |              |              |               |               |                |                |
| Male (n= 1,899)                    | -8.2 ± 56.9  | 38.5 ± 52.9  | -13.2 ± 61.1  | 38.6 ± 59.5   | -8.8 ± 101.6   | 29.6 ± 101.6   |
| Female (n= 1,816)                  | 45.2 ± 48.3  | 65.1 ± 52.6  | 38.0 ± 51.1   | 59.5 ± 56.1   | 73.5 ± 87.2    | 89.0 ± 99.4    |
| <b>Race/Ethnicity</b>              |              |              |               |               |                |                |
| White (n= 1,024)                   | -50.4 ± 62.0 | 62.8 ± 61.1  | -53.2 ± 61.4  | 58.9 ± 60.9   | 18.4 ± 112.0   | 117.1 ± 116.4  |
| Black (n= 937)                     | 8.5 ± 89.5   | 30.2 ± 91.2  | 22.4 ± 90.8   | 33.4 ± 84.3   | -36.8 ± 120.9  | 43.1 ± 123.7   |
| Hispanic (n= 1,250)                | 13.1 ± 51.1  | 42.5 ± 47.6  | -5.6 ± 54.9   | 2.1 ± 52.7    | -28.4 ± 99.6   | 42.9 ± 90.9    |
| Other (n= 504)                     | 35.0 ± 148.1 | 48.0 ± 135.6 | 52.1 ± 151.9  | 109.0 ± 142.8 | -136.2 ± 215.3 | -184.1 ± 192.8 |
| <b>Income</b>                      |              |              |               |               |                |                |
| 1 <sup>st</sup> tertile (n= 1540)  | -96.7 ± 69.4 | -29.0 ± 62.4 | -107.1 ± 68.9 | -41.5 ± 62.8  | 1.9 ± 132.9    | 90.9 ± 128.9   |
| 2 <sup>nd</sup> tertile (n= 1082)  | 78.7 ± 80.2  | 18.7 ± 75.7  | 58.4 ± 87.1   | 126.7 ± 82.9  | 75.0 ± 135.5   | 57.2 ± 153.3   |
| 3 <sup>rd</sup> tertile (n= 787)   | -36.5 ± 63.1 | 46.8 ± 63.2  | -28.1 ± 55.8  | 45.1 ± 58.1   | -66.5 ± 141.4  | 35.4 ± 142.2   |

<sup>1</sup>Estimates reflect difference in mean total energy intakes (kcal/day) between LCS consumers and non-consumers. Negative values reflect lower mean energy intake in LCS consumers. Positive values reflect higher mean energy intakes in LCS consumers.

<sup>2</sup>Adjusted model included the following covariates: age, sex, race/ethnicity, income, body mass index, and physical activity.

\*p<0.05; \*\*p<0.01; \*\*\*p<0.001
